# Supplementary material for: Susceptibility to Degradation in Soil of Branched Polyesterurethane Blends with Polylactide and Starch
Source: MDPI journal article supplement (doi:10.3390/polym14102086), 2022-05-20
Supplement: s1 [file s1]

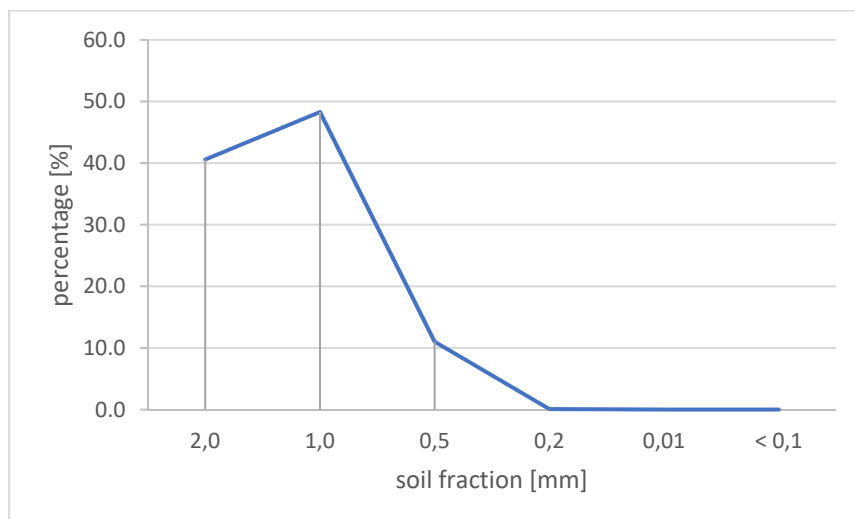

Figure S1. Soil sieve analysis.

Table S1. Basic soil parameters (before and after adding the biohumus solution).

| Parameter                      | Analysis method                             | Device                                         | Unit              | Soil     | Soil with biohumus |
|--------------------------------|---------------------------------------------|------------------------------------------------|-------------------|----------|--------------------|
| conductivity                   | PN-EN 12457-4:2006<br>oraz PN-EN 27888:1999 | inoLab® Cond 7310                              | μS/cm             | 154.0    | 168.1              |
| density of soil solids         |                                             | biuret method                                  | g/cm <sup>3</sup> | 2.28     | 2.14               |
| ammonium nitrogen              | PB-178 Hamilton (in-house)                  | Titration method                               | % s.m             | 0.00337  | 0.00429            |
| Kiejdahl nitrogen              | PN_EN 13342:2002                            | KjelROC Analyzer, KD-310-A                     | % s.m.            | 0.20     | 0.24               |
| DOC (Dissolved Organic Carbon) | PN-EN 12457-4:2006;<br>PN-EN1484:1999       | ANALITYCJENA, Multi N/C 3100 N3-1552/AU        | mg/kg             | 100.9    | 130.5              |
| TOC (Total Organic Carbon)     | PN-EN 12457-4:2006;<br>PN-EN1484:1999       | ANALITYCJENA, Multi N/C 3100 N3-1552/AU        | mg/l              | 10.09    | 13.05              |
| Zn                             | ICP-OES                                     | Thermo Scientific™ iCAP™ 7400 ICP-OES Analyzer | mg/kg             | 32.228   | 33.4               |
| Cu                             | ICP-OES                                     | Thermo Scientific™ iCAP™ 7400 ICP-OES Analyzer | mg/kg             | 4.33     | 4.412              |
| Ni                             | ICP-OES                                     | Thermo Scientific™ iCAP™ 7400 ICP-OES Analyzer | mg/kg             | 3.006    | 2.854              |
| Pb                             | ICP-OES                                     | Thermo Scientific™ iCAP™ 7400 ICP-OES Analyzer | mg/kg             | 10.31    | 9.712              |
| Cr                             | ICP-OES                                     | Thermo Scientific™ iCAP™ 7400 ICP-OES Analyzer | mg/kg             | 11.448   | 10.954             |
| Cd                             | ICP-OES                                     | Thermo Scientific™ iCAP™ 7400 ICP-OES Analyzer | mg/kg             | 0.285    | 0.276              |
| Fe                             | ICP-OES                                     | Thermo Scientific™ iCAP™ 7400 ICP-OES Analyzer | mg/kg             | 6456.494 | 6138.294           |
| Ca                             | ICP-OES                                     | Thermo Scientific™ iCAP™ 7400 ICP-OES Analyzer | mg/kg             | 3121.167 | 13196.403          |
| Mg                             | ICP-OES                                     | Thermo Scientific™ iCAP™ 7400 ICP-OES Analyzer | mg/kg             | 1272.956 | 1184.888           |
| P                              | ICP-OES                                     | Thermo Scientific™ iCAP™ 7400 ICP-OES Analyzer | mg/kg             | 685.023  | 664.544            |

|    |         |                                                   |       |          |          |
|----|---------|---------------------------------------------------|-------|----------|----------|
| K  | ICP-OES | Thermo Scientific™ iCAP™<br>7400 ICP-OES Analyzer | mg/kg | 1645.226 | 1673.819 |
| As | ICP-OES | Thermo Scientific™ iCAP™<br>7400 ICP-OES Analyzer | mg/kg | 2.261    | 2.612    |
| Hg | CVAAS   | MA-3000 NIPPON<br>Instruments Corporation         | mg/kg | 0.021    | 0.014    |

Table S2. Microbial characteristic of soil with biohumus

| Parameter                                | Method                                                                 | Culture medium                                     | Number of colony-forming<br>bacterial/fungi units [CFU/g] |
|------------------------------------------|------------------------------------------------------------------------|----------------------------------------------------|-----------------------------------------------------------|
| Total bacteria<br>count (TBC)            | PN-EN ISO 4833-1:2013-<br>12+Ap1:2016-11, surface<br>plating technique | Tryptone Soya Agar                                 | $2.0 \times 10^7$                                         |
| Total Yeast and<br>Mold Counts<br>(TYMC) | PN ISO 7954:1999, surface<br>plating technique                         | Yeast Extract Glucose<br>Chloramphenicol<br>Medium | $3.3 \times 10^5$                                         |
| <i>Escherichia coli</i>                  | PN-EN ISO 16649-2:2004,<br>pour plate method                           | Chromid Id Coli agar                               | <10                                                       |
| <i>Citrobacter spp.</i>                  | PN-EN ISO 16649-2:2004,<br>pour plate method                           | Chromid Id Coli agar                               | $6.4 \times 10^2$                                         |
| <i>Salmonella spp.</i>                   | PN-Z-19000-1:2001, surface<br>plating technique                        | Brilliance Salmonella<br>Agar                      | $4.6 \times 10^4$                                         |
| <i>Bacillus spp.</i>                     | PN-EN ISO 7932:1999, pour<br>plate method                              | Bacillus ChromoSelect<br>Agar                      | $4.4 \times 10^5$                                         |
| <i>Listeria<br/>monocytogenes</i>        | PN-EN ISO 11290-1:2017-07,<br>horizontal method                        | Chromogenic Listeria<br>agar ISO 11290             | was not found                                             |

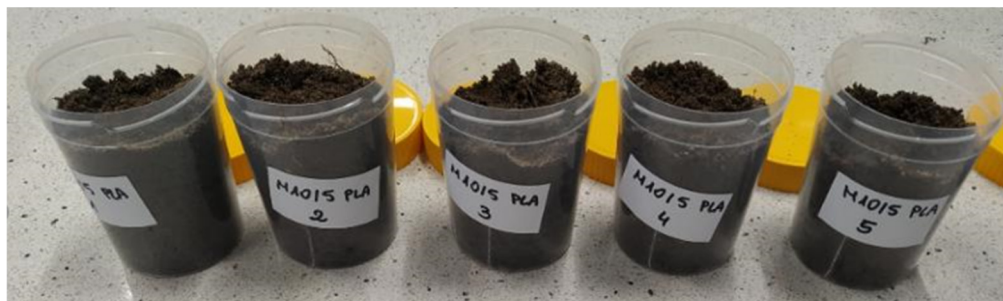

Figure S2. Containers with soil and PUR 10/5 + PLA samples prepared for placing in the incubation chamber.

Table S3. Images of samples at 4, 12 and 36 weeks of exposure to soil.

| Sam<br>ple | Incubation time [weeks]                                                             |                                                                                     |                                                                                       |
|------------|-------------------------------------------------------------------------------------|-------------------------------------------------------------------------------------|---------------------------------------------------------------------------------------|
|            | 4                                                                                   | 12                                                                                  | 36                                                                                    |
| PUR 10/5   |  |  |  |

|              |                                                                                     |                                                                                     |                                                                                       |
|--------------|-------------------------------------------------------------------------------------|-------------------------------------------------------------------------------------|---------------------------------------------------------------------------------------|
| PUR 10/5+PLA |    |    |    |
| PUR 20/5     |    |    |    |
| PUR 20/5+PLA |   |   |   |
| PUR 20/5+St  |  |  |  |

Table S4. The values of the wavenumbers of the bands corresponding to the vibrations of the bonds in groups potentially susceptible to hydrolysis before and after 36 weeks of exposure to soil.

| Sample          |        | $\nu(\text{N-H})$<br>[cm <sup>-1</sup> ] | $\nu\text{C=O}$<br>(ester)<br>and Amide I<br>[cm <sup>-1</sup> ] | Amide II<br>$\delta(\text{NH})$ ,<br>$\nu(\text{CN})$<br>[cm <sup>-1</sup> ] | Amide III<br>$\nu(\text{CN})$ , $\delta(\text{CO})$ ,<br>$\nu(\text{NH})$<br>[cm <sup>-1</sup> ] | $\nu(\text{C=O})\text{-O}$<br>[cm <sup>-1</sup> ] | $\nu(\text{C-O})$<br>(hydrogen<br>bonded)<br>[cm <sup>-1</sup> ] |
|-----------------|--------|------------------------------------------|------------------------------------------------------------------|------------------------------------------------------------------------------|--------------------------------------------------------------------------------------------------|---------------------------------------------------|------------------------------------------------------------------|
| PUR10/5         | before | 3369.0                                   | 1720.7                                                           | 1523.0                                                                       | 1241.0                                                                                           | 1187.5                                            | 1099.2; 1045.7                                                   |
|                 | after  | 3365.7                                   | 1721.2                                                           | 1523.5                                                                       | 1240.0                                                                                           | 1187.5                                            | 1097.3; 1044.7                                                   |
| PUR<br>10/5+PLA | before | 3366.1                                   | 1721.2                                                           | 1525.9                                                                       | 1240.0                                                                                           | 1181.7                                            | 1085.7; 1045.2                                                   |
|                 | after  | 3356.5                                   | 1722.1                                                           | 1525.4                                                                       | 1239.0                                                                                           | 1180.2                                            | 1088.1; 1044.3                                                   |
| PUR20/5         | before | 3433.6                                   | 1722.1                                                           | 1524.5                                                                       | 1240.0                                                                                           | 1177.8                                            | 1099.2; 1046.2                                                   |
|                 | after  | 3344.4                                   | 1721.6                                                           | 1524.5                                                                       | 1239.5                                                                                           | 1177.3                                            | 1097.8; 1045.2                                                   |
| PUR<br>20/5+PLA | before | 3369.5                                   | 1724.5                                                           | 1523.0                                                                       | 1238.6                                                                                           | 1180.7                                            | 1085.2; 1046.2                                                   |
|                 | after  | 3371.4                                   | 1723.1                                                           | 1523.5                                                                       | 1239.0                                                                                           | 1178.3                                            | 1096.8; 1045.2                                                   |
| PUR<br>20/5+St  | before | 3365.2                                   | 1722.6                                                           | 1523.5                                                                       | 1239.5                                                                                           | 1177.8                                            | 1100.2; 1045.7                                                   |
|                 | after  | 3357.0                                   | 1721.6                                                           | 1524.0                                                                       | 1239.5                                                                                           | 1178.3                                            | 1099.2; 1045.7                                                   |

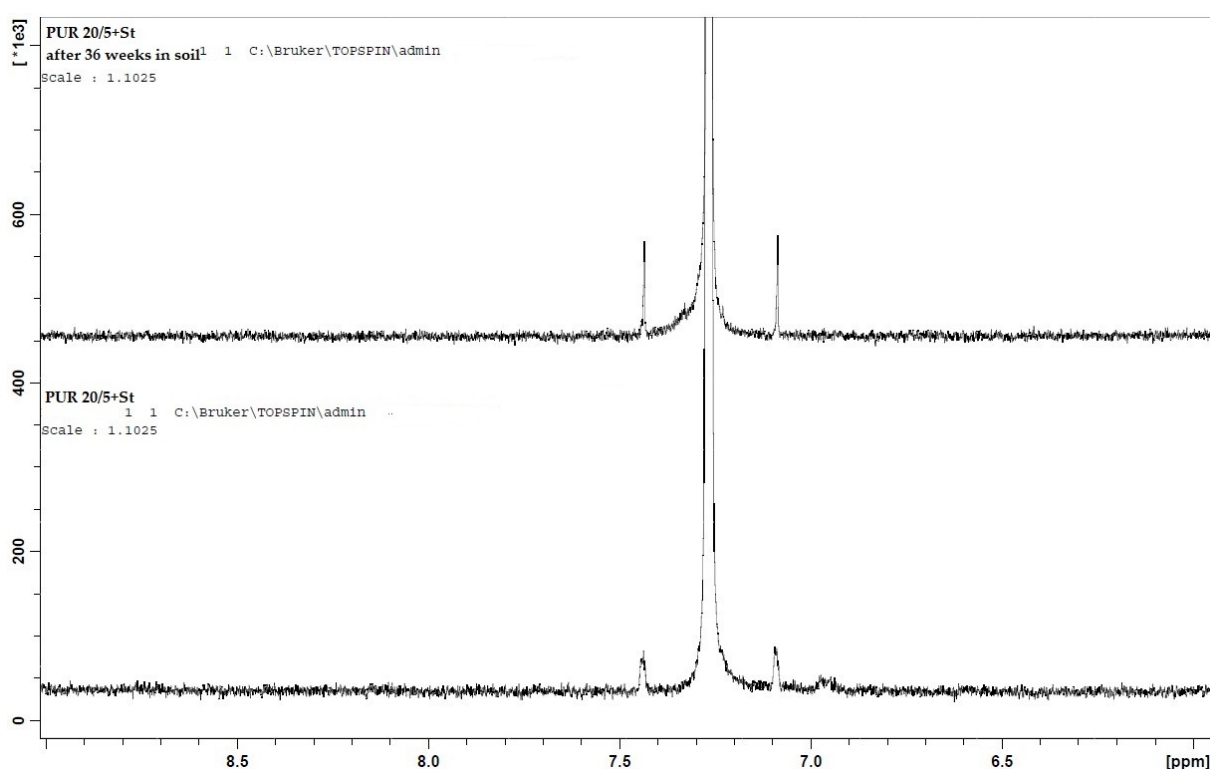

Figure S3. Range from 6 to 9 ppm of <sup>1</sup>H NMR spectra of PUR 20/5 + St before and after 36 weeks of exposure to soil.

Table S5. Microscopic images of the surface of PUR samples and their blends under reflected light before and after 36 weeks of exposure to soil.

| Sample              | Before incubation                                                                                          | After incubation                                                                     |
|---------------------|------------------------------------------------------------------------------------------------------------|--------------------------------------------------------------------------------------|
| PUR 10/5            | 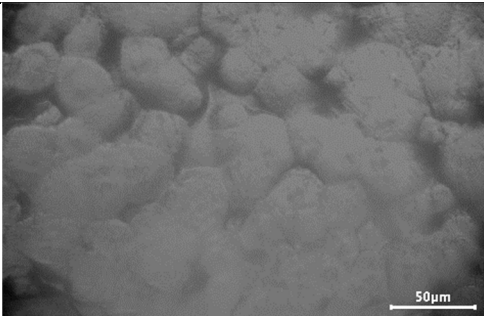                          |    |
| PUR 10/5<br>+ PLA   |                           |    |
| PUR 20/5            |                          |   |
| PUR 20/5<br>+ PLA   | <br>lower magnification |  |
| PUR 20/5<br>+<br>St |                         |  |

Table S6. Microscopic images of the surface of PUR samples and their blends under transmitted light before and after 36 weeks of exposure to soil.

| Sample            | Before incubation                                                                   | After incubation                                                                     |
|-------------------|-------------------------------------------------------------------------------------|--------------------------------------------------------------------------------------|
| PUR 10/5          | 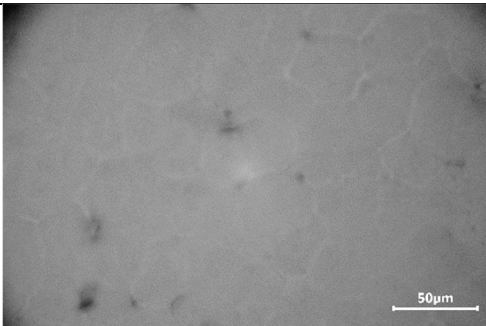   |    |
| PUR 10/5<br>+ PLA |    |    |
| PUR 20/5          |   |   |
| PUR 20/5<br>+ PLA |  |  |
| PUR 20/5<br>+ St  |  |  |

Table S7. The values of the contact angle of the pristine and degraded PURs and their blends, 0, 1 and 3 minutes after planting the drop on the surface

| Sample           | Contact angle ( $\pm$ SD) [°]                           |            |            |
|------------------|---------------------------------------------------------|------------|------------|
|                  | in time after immersion of drop on sample surface [min] |            |            |
|                  | 0                                                       | 1          | 3          |
| PUR 10/5         | 75.7 (1.8)                                              | 69.9 (1.8) | 64.7 (1.7) |
| PUR 10/5 S       | 65.2 (0.2)                                              | 58.5 (2.3) | 51.4 (4.2) |
| PUR 10/5 + PLA   | 73.8 (1.7)                                              | 67.0 (1.1) | 61.7 (1.3) |
| PUR 10/5 + PLA S | 79.5 (2.2)                                              | 73.1 (1.4) | 67.4 (1.2) |
| PUR 20/5         | 77.6 (1.0)                                              | 67.5 (1.9) | 60.8 (1.6) |
| PUR 20/5 S       | 68.2 (0.2)                                              | 63.0 (0.4) | 58.6 (0.6) |
| PUR 20/5 + PLA   | 72.8 (3.8)                                              | 65.1 (2.5) | 60.0 (2.8) |
| PUR 20/5 + PLA S | 90.8 (2.4)                                              | 82.4 (1.4) | 74.4 (1.6) |
| PUR 20/5 + St    | 71.6 (5.8)                                              | 64.5 (5.4) | 58.7 (5.3) |
| PUR 20/5 + St S  | 67.0 (4.7)                                              | 62.1 (3.6) | 56.3 (2.8) |
